# Supplementary material
Source: PubMed Central journal article supplement (PMC9845432)
Supplement: NIHMS1811369-supplement-1.pdf [file NIHMS1811369-supplement-1.pdf]

### Supplementary Figure 1

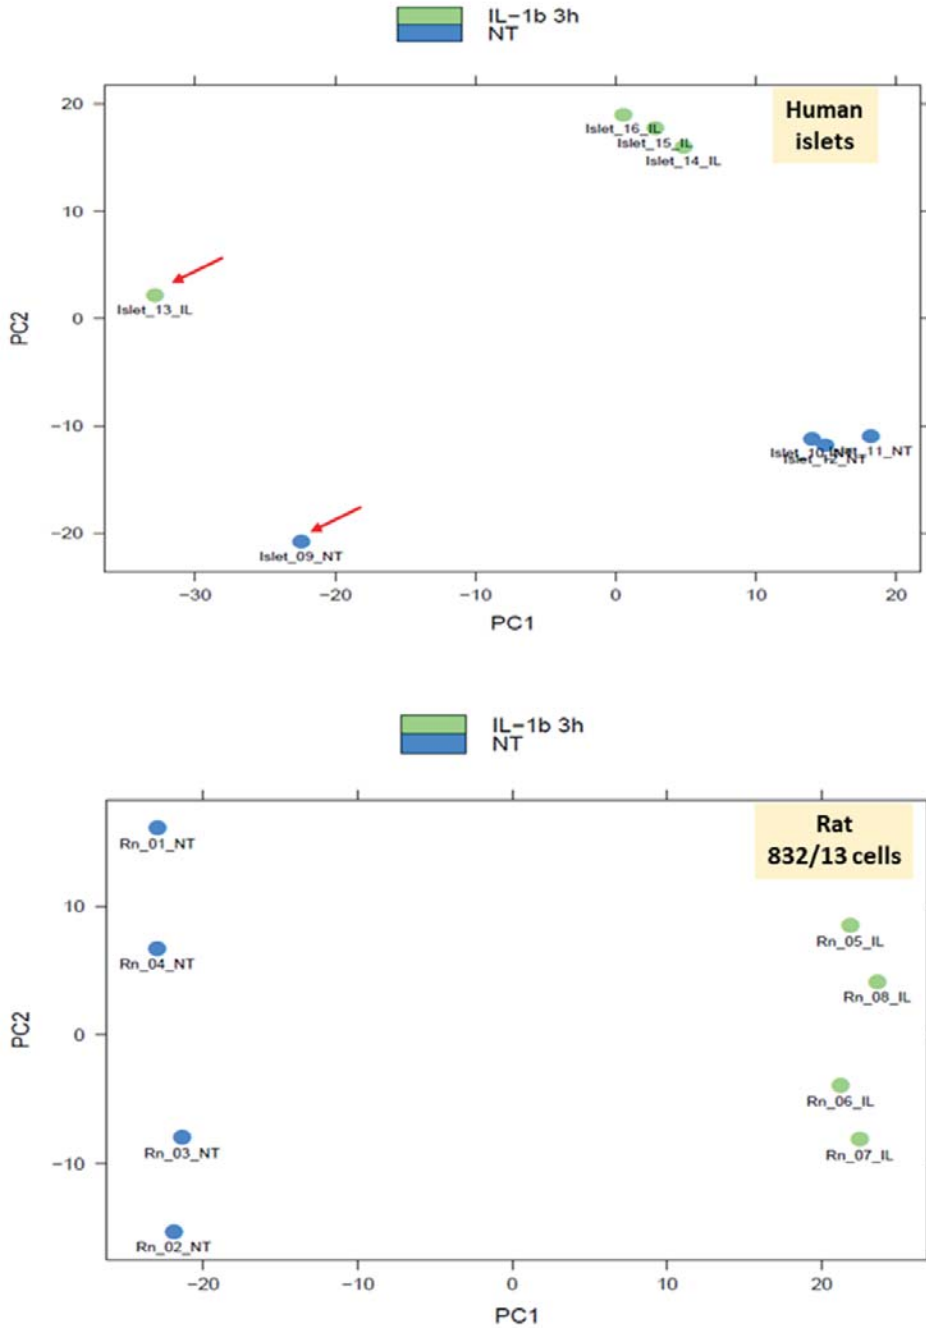

**Supplementary Figure 1.** Principal components analysis was performed on variance stabilized RNAseq count data (generated via DESeq2 software) on 11720 genes across 20 samples. The scatterplot shows the location of samples along the first 2 principal components, along with the percent of total variation explained by each component. Samples are color coded according to the treatment groups (blue, NT; green, IL-1 $\beta$ ). Red arrows indicate outliers that were excluded from the final analysis.

Supplementary Figure 2

**C57BL/6J  
(8 wk)**

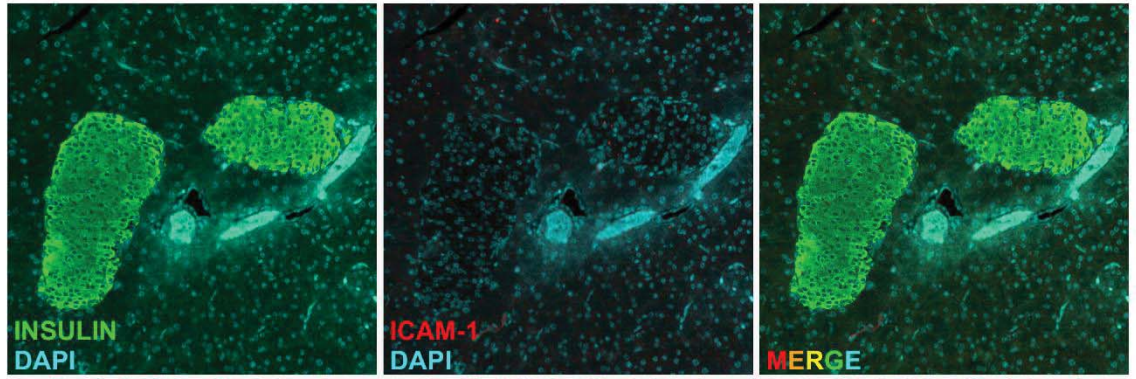

**NOD  
(8 wk)**

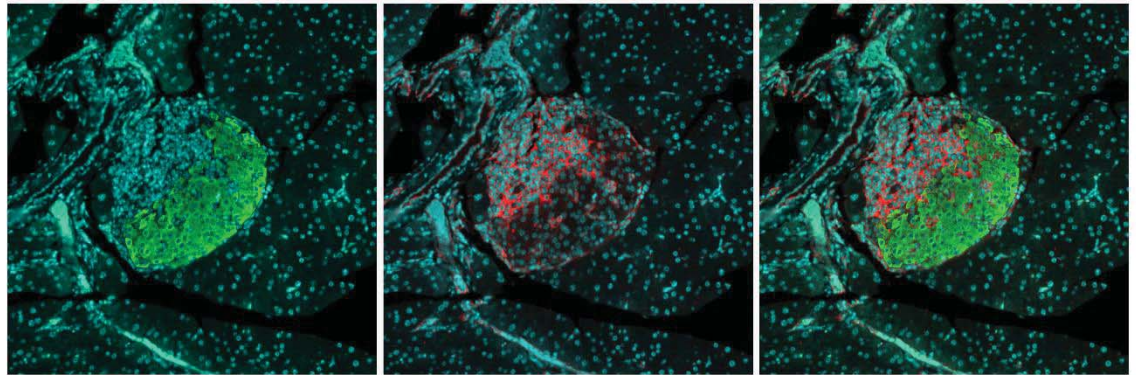

**C57BL/6J  
(12 wk)**

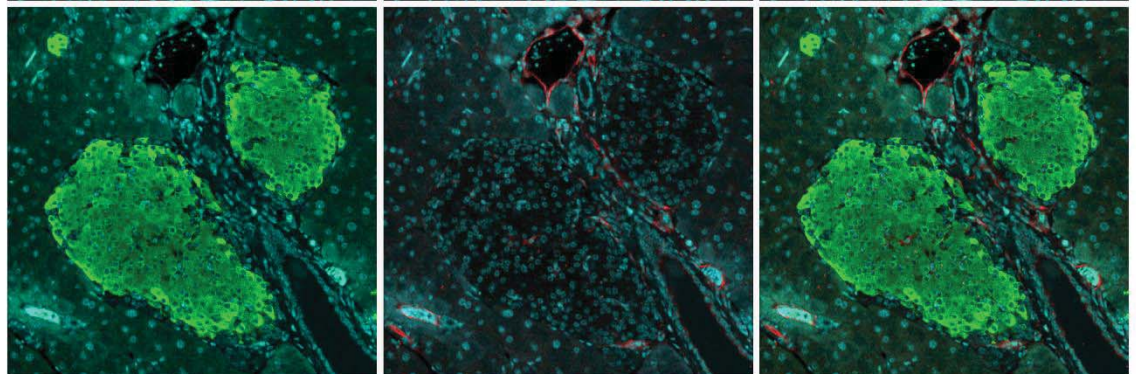

**NOD  
(12 wk)**

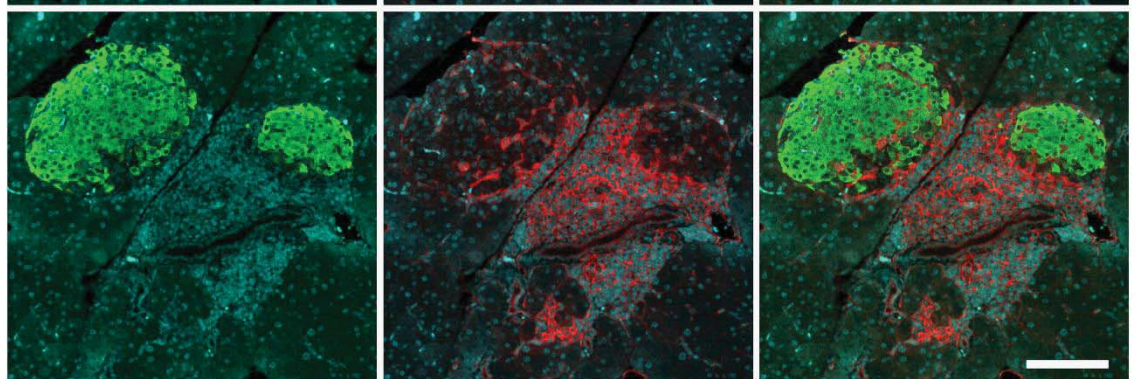

**Supplementary Figure 2. Expression of ICAM-1 in Mouse Pancreatic Tissue.** Pancreatic tissue from normoglycemic female C57BL/6J and NOD mice were collected at 8 and 12 weeks of age. Formalin-fixed paraffin embedded sections were sectioned and stained with antibodies against insulin (green) and ICAM-1 (red). The single channel and the merged images are shown. The scale bar in the lower right hand panel represents 100 microns.

**Supplementary Table 1\_PCR Primers and Conserved DNA Sequences**

| Cloning       | Forward Sequence                            | Reverse Sequence                            |
|---------------|---------------------------------------------|---------------------------------------------|
| Icam1<br>-3kb | TGTAGAGCTCGCTCTTAATTGCTGAACCAC              | CATAAGCTTATTGGAGGACCAGGGCAAA                |
| Icam1<br>-1kb | TTAAGGTCATCCTCAGTTACCG                      | CATAAGCTTATTGGAGGACCAGGGCAAA                |
| κB4m          | GATGATCCCTGCAGGA <u>gg</u> TTCCCATATTCAGATC | GATCTGAATATGGGAA <u>cc</u> TCCTGCAGGGATCATC |
| κB3m          | CATCCCCGTGGAA <u>gg</u> TCCTCAGGAATAACC     | GGTATTCCTGAGGA <u>cc</u> TTCCACGGGGATG      |
| κB2m          | GTCAAGTGGGTGG <u>tt</u> CATGGCCCTAGGGAGAG   | CTCTCCCTAGGGCCATG <u>aa</u> CCACCCACTTGAC   |
| κB1m          | CTTCAGTTTGGAA <u>gg</u> TCCTGGGTGCGAGG      | CCTGCGACCCAGGA <u>cc</u> TTCCAAACTGAAG      |
| GASm          | CGAGGTTTCCGGG <u>tg</u> AGTGGCCCCAAC        | GTTGGGGCCACT <u>ca</u> CCCGGAAACCTCG        |

| RT-PCR      | Forward Sequence     | Reverse Sequence     |
|-------------|----------------------|----------------------|
| Rs9         | TCCGGAACAACCGTGAGG   | TCCAGCTTCATCTTGCCC   |
| Human ICAM1 | GGCTGGAGCTGTTTGAGAAC | ACTGTGGGGTTCAACCTCTG |
| Mouse Icam1 | TTCACACTGAATGCCAGCTC | GTCTGCTGAGACCCCTCTTG |
| Rat Icam1   | CACCCACCTCACAGGGTACT | GTCTGCTGAGACCCCTCTTG |

| ChIP | Forward Sequence                   | Reverse Sequence     |
|------|------------------------------------|----------------------|
| κB4  | TTCTGTGTCGCTGCTCCATT               | TGTGAAGTGGGCACCATCCG |
| κB3  | CCCCTCCCCCAAGATCAAA                | CGCCTGAAGCCTGGGTATTC |
| κB3  | TGCTCGGAAAATCTCTAGCGT              | TCAGAGGTGCCCTCTCCCT  |
| κB2  | CCCACATGTCATTA <sup>CT</sup> CAGTT | GTGGTCCTGCCTCGCTG    |
| κB1  | AAATACCGAAGCCCTCATTCC              | AGGGGCGGTGCTGTT      |
| TSS  | AAGCTGCGTGCGGTCT                   | GCCTGGCACGGGTTGAA    |
| 5kb  | AGCTGGCTTCGGCTTTGAA                | GGCCTTTAGGCTTCCCTGTA |
| 10kb | GTCTCAGAAGGGGACCAAGTA              | GGGAAGTACCCTGTGAGGTG |

**Supplementary Table 2\_Antibodies**

| <b>Antibody</b>                  | <b>Application</b> | <b>Company</b>            | <b>Catalog #</b> |
|----------------------------------|--------------------|---------------------------|------------------|
| IgG                              | ChIP               | Sigma Aldrich             | I8140            |
| p65                              | ChIP               | Cell Signaling Technology | CST-8242         |
| RNA Pol II CTD repeat phospho S5 | ChIP               | Abcam                     | ab5131           |
| RNA Pol II CTD repeat phospho S2 | ChIP               | Abcam                     | ab5095           |
| Histone H3K4me1                  | ChIP               | Diagenode                 | C15310037        |
| Histone H3K4me3                  | ChIP               | Diagenode                 | C15310003        |
| Histone H3K4ac                   | ChIP               | Diagenode                 | C15410322        |
| Icam1                            | Immunoblot         | R&D Systems               | AF583            |
| iNOS                             | Immunoblot         | Cayman Chemical           | 160862           |
| $\beta$ -Actin                   | Immunoblot         | Cell Signaling Technology | CST-3700         |
